1 **Structural covariance networks in the fetal brain reveal altered neurodevelopment for**  
2 **specific subtypes of congenital heart disease**

3 Siân Wilson PhD<sup>\*1,2</sup>, Daniel Cromb MRCPCH<sup>\*1</sup>, Alexandra F. Bonthron PhD<sup>1</sup>, Alena Uus  
4 PhD<sup>1,3</sup>, Anthony Price PhD<sup>1</sup>, Alexia Egloff MD<sup>1</sup>, Milou P.M Van Poppel MSc<sup>3,4</sup>, Johannes K  
5 Steinweg MBBS<sup>3,4</sup>, Kuberan Pushparajah PhD<sup>3,4</sup>, John Simpson FRCP<sup>3,4</sup>, David FA Lloyd  
6 PhD<sup>3,4</sup>, Reza Razavi PhD<sup>3</sup>, Jonathan O'Muircheartaigh PhD<sup>1</sup>, A. David Edwards DSc<sup>1</sup>, Joseph  
7 V. Hajnal PhD<sup>1,3</sup>, Mary Rutherford FRCR<sup>1</sup>, Serena J. Counsell PhD<sup>1</sup>

8 1. Centre for the Developing Brain, School of Biomedical Engineering and Imaging Sciences,  
9 King's College London, UK

10 2. Fetal and Neonatal Developmental Science Centre, Boston Children's Hospital, Harvard  
11 Medical School, Boston, USA.

12 3. Biomedical Engineering Department, School of Biomedical Engineering and Imaging  
13 Sciences, King's College London, London, UK

14 4. Department of Congenital Heart Disease, Evelina London Children's Hospital, London, UK

15

16 \*Joint first authorship

17 **Short title:**

18 **Structural covariance in fetuses with CHD**

19

20 Corresponding author:  
21 Professor Serena Counsell  
22 Centre for the Developing Brain, School of Biomedical Engineering & Imaging Sciences  
23 King's College London,  
24 London, SE1 7EH, UK  
25 Email: [serena.counsell@kcl.ac.uk](mailto:serena.counsell@kcl.ac.uk)

26 Phone: +44 (0)20 7188 7188 ext. 53612

27 Fax: +44 (0)20 7188 8154

28

29 **Word count:** 5522

30

31 **Abstract**

1

32 **Background** Altered structural brain development has been identified in fetuses with Congenital  
33 Heart Disease (CHD), suggesting that the neurodevelopmental impairment observed later in life  
34 might originate in utero. There are many interacting factors that may perturb neurodevelopment  
35 during the fetal period and manifest as structural brain alterations, such as altered cerebral  
36 substrate delivery and aberrant fetal hemodynamics.

37 **Methods** We extracted structural covariance networks (SCNs) from the log Jacobian  
38 determinants of 429 in utero T2w MRI scans, (n = 67 controls, 362 CHD) acquired during the  
39 third trimester. We fit general linear models to test whether age, sex, expected cerebral  
40 substrate delivery and CHD diagnosis were significant predictors of structural covariance.

41 **Results** We identified significant effects of age, sex, cerebral substrate delivery, and specific  
42 CHD diagnosis across a variety of SCNs, including primary motor and sensory cortices,  
43 cerebellar regions, frontal cortex, extra-axial CSF, thalamus, brainstem, and insula, consistent  
44 with widespread coordinated aberrant maturation of specific brain regions over the third  
45 trimester.

46 **Conclusions** SCNs offer a sensitive, data-driven approach to explore whole-brain structural  
47 changes without anatomical priors. We used them to stratify a heterogenous CHD patient  
48 cohort, highlighting similarities and differences between diagnoses during fetal  
49 neurodevelopment. Although there was a clear effect of abnormal fetal hemodynamics on  
50 structural brain maturation, our results suggest that this alone does not explain all the variation  
51 in brain development between individuals with CHD.

52

53

54 **Introduction**

55 Congenital heart disease (CHD) is the most common congenital malformation (EUROCAT  
56 2020), occurring at a frequency of 0.8% to 1.2% of live births worldwide (Dolk et al., 2011,  
57 Bouma & Mulder 2017). CHD encompasses a wide spectrum of cardiovascular defects, from  
58 simple cardiac malformations to more complex and severe lesions that require surgical  
59 intervention. Following improvements in surgical and therapeutic intervention over the last two  
60 decades, most patients with CHD will survive into adulthood (Dellborg et al., 2023). However,  
61 many will display impairments affecting a wide range of neurodevelopmental domains (Latal et  
62 al, 2016, Newburger et al., 2012, Naef et al., 2017, Marelli et al., 2016, Bellinger et al 2011).  
63 Research into the mechanisms underpinning impaired neurodevelopment in CHD may enable  
64 appropriate preventative prenatal interventions to promote improved neurodevelopmental  
65 outcomes later in life.

66 With recent advances in fetal MRI, it has become possible to study brain development in utero.  
67 Previous work has identified deviations from normal brain growth trajectories in fetuses with  
68 CHD, including reduced regional brain volumes (Limperopoulos 2010, Clouchoux et al., 2013,  
69 Brossard-Racine 2014, Ren et al., 2021, Dovjak et al., 2022, Cromb et al. 2023), altered  
70 volumes of transient fetal compartments (Rollins et al., 2021, Wu et al., 2021), reduced cortical  
71 folding (Ortinou 2019, Jaimes et al., 2020) and a relationship between cerebral oxygen delivery  
72 and fetal brain size (Sun et al., 2015, Cromb et al, 2023). These studies demonstrate that  
73 abnormal neurodevelopment in the CHD population begins in utero during a period of rapid  
74 brain growth, featuring metabolically demanding cellular processes such as gyrification,  
75 oligodendrocyte maturation, and synaptogenesis. It has been hypothesised that aberrant  
76 cardiovascular physiology, altering the delivery of oxygen, glucose and other nutrients to the  
77 fetal brain during this critical window, impairs brain development (Peyvandi 2021, Lauridsen  
78 2017, Sun 2015). Different types of CHD will affect the pattern of cerebral substrate delivery in  
79 different ways, likely having unique implications for brain development (Sun et al., 2021, Rollins

80 et al., 2021, Cromb et al., 2023). There are also a multitude of other interacting factors that may  
81 perturb neurodevelopment during the fetal period and manifest as structural brain alterations.  
82 These include genetic factors, placental function, maternal stress, socioeconomic and  
83 environmental factors. Disentangling the effect of each of these factors remains a challenge,  
84 and therefore our understanding of structural brain abnormalities in the CHD population is  
85 incomplete.

86 In this work, we extracted structural covariance networks (SCNs) from the brain MRI of 429  
87 fetuses. SCNs represent brain regions with coherent structural expansion and coordinated,  
88 independent maturational trajectories, often converging on functional brain networks (Geng et  
89 al., 2017, Seeley et al., 2009). SCNs have been used effectively to investigate changes in the  
90 organization of the brain at the network level, both in healthy ageing populations (Li et al., 2013,  
91 Geng et al., 2017, Spreng & Turner 2013), and in at-risk populations including preterm infants  
92 (Fenchel et al., 2021, Vanes et al., 2021), psychiatric patient cohorts (Bassett et al., 2008,  
93 Heinze et al., 2015), and in neurodegenerative disease (He et al., 2008, Seeley et al., 2009).  
94 SCNs offer a data-driven, dimensionality reduction approach, removing the dependency on  
95 predefined regions of interest, which allows the examination of dynamic contrast changes  
96 across space and time. This is particularly relevant for investigating the maturation of the fetal  
97 brain, which is rapid, complex, and characterised by the presence of transient structures  
98 (Kostovic & Rakic 1990). This model-free approach is also well suited to studying the  
99 heterogenous and varied pathophysiology of CHD, as it extracts features that represent  
100 independent modes of variation across the cohort. We hypothesized that by examining the  
101 sources of variance, we would be able to disentangle the effect of specific cardiac defects on  
102 the developing brain.

103 To address this challenge, we examined a large cohort of 429 fetuses, including 369 fetuses  
104 with CHD. There are many approaches to categorize CHD cohorts (Sun et al., 2015, Roberts et

105 al., 2020) and explore the interplay between cardiovascular physiology and fetal brain  
106 development. For the purpose of this study, we divided the CHD cohort into groups based on  
107 the expected effect of the underlying cardiac defect on the streaming of substrate-rich placental  
108 blood to the cerebral circulation (Cromb et al., 2023). Each subject was reviewed individually,  
109 using fetal phase-contrast MRI flow data and/or contemporaneous echocardiography where  
110 available, as published in previous work (Cromb et al., 2023). This categorization was used to  
111 test the specific hypothesis that cerebral substrate delivery affects the co-maturation of  
112 SCNs.

113 We also examined whether gestational age, sex, and CHD diagnosis are underlying sources of  
114 variation in structural brain maturation. With this approach, we stratified our large cohort of  
115 fetuses with CHD, identifying SCNs that vary across the population according to cerebral  
116 substrate delivery and more specifically, CHD diagnosis. We identify networks whose  
117 coordinated maturation is different from healthy controls but shared between multiple subtypes  
118 of CHD. We also find networks that are uniquely different for specific CHD diagnoses. Overall,  
119 this approach identified associations between specific cardiac defects and how they manifest in  
120 the developing fetal brain, which offers crucial insight into the potential structural underpinnings  
121 of neurodevelopmental abnormalities.

122

## 123 **Methods**

### 124 **Ethical approval**

125 The National Research Ethics Service West London committee provided ethical approval  
126 (07/H0707/105, 14/LO/1806, 17/LO/0292). Informed written consent was obtained before fetal  
127 MRI.

## 128 **Participants**

129 Mothers were recruited between June 2014 and June 2022 at the Evelina Children's Hospital in  
130 London, following routine ultrasound during the second trimester. 529 women (maternal age  
131 scan=31.52 ( $\pm$ 5.73) years) were carrying a fetus with either known or suspected CHD.  
132 Participants were scanned during the third trimester, between 27 and 36 gestational weeks  
133 (GW). Exclusion criteria for mothers included multiple pregnancies, maternal weight over 125 kg  
134 (at time of scan), maternal diabetes, maternal hypertension, inability to give informed consent,  
135 or age under 18 years at the time of referral.

136 We also excluded fetuses with confirmed genetic diagnosis, such as 22q deletion syndrome,  
137 extracardiac anomalies, such as congenital diaphragmatic hernia or duodenal atresia, or  
138 structural brain abnormalities reported on fetal MRI, including bilateral ventriculomegaly,  
139 cerebellar hypoplasia or absence of the corpus callosum. After applying the exclusion criteria,  
140 the cohort consisted of 429 fetal MR scans (including 67 controls, and 362 fetuses diagnosed  
141 with CHD).

## 142 **Image acquisition & reconstruction**

143 All scans were acquired on a Philips Ingenia 1.5T scanner, with 28-channel dStream anterior  
144 and posterior built-in coils. The T2-weighted fast-spin-echo sequence was specifically optimised  
145 for fetal imaging (TR = 13 ms, TE = 80 ms, image resolution= 1.25x1.25x2.5mm, slice thickness  
146 = 2.5 mm, slice spacing = 1.25 mm). A 3D slice-to-volume image reconstruction pipeline  
147 (available at <https://github.com/SVRTK/SVRTK>, <https://hub.docker.com/r/fetalsvrtk/svrtk>  
148 auto2.20) was used for motion correction, reconstructing the T2w images to 0.5mm<sup>3</sup> isotropic  
149 resolution (Kuklisova-Murgasova 2012, Uus et al., 2021).

## 150 **MRI Quality control**

151 All MRI scans were reviewed and reported by expert perinatal radiologists. The presence of any  
152 structural abnormalities was recorded, and image quality was scored on a scale from 1-4, based  
153 on the signal:noise ratio, presence of artefacts, field of view and residual motion (4 = High  
154 quality, 3 = Acceptable, 2 = Poor, 1 = Failed). Only subjects scoring 3 or 4 were included in the  
155 study, as previously described (Uus et al., 2022, Cromb et al., 2023).

## 156 **Cerebral substrate delivery categorisation**

157 To explore the hypothesis that impaired cerebral substrate delivery plays a major role in the  
158 neurodevelopmental abnormalities associated with CHD, we divided the CHD cohort into 4  
159 groups, according to the predicted level of substrate delivery to the developing fetal brain, based  
160 on the expected consequence of the underlying cardiac defect as described previously (Cromb  
161 et al, 2023).

162 (A) Group 1 = Substrate content of cerebral blood is expected to be normal (n = 232 (113  
163 male),  $\mu = 31.81 \text{ GW} \pm 1.55$ ),

164 (B) Group 2 = Substrate content of cerebral blood is expected to be mildly reduced (i.e.  
165 some mixing of placental and fetal systemic venous blood) (n = 67 (35 male),  $\mu = 32.37$   
166  $\text{GW} \pm 1.52$ ),

167 (C) Group 3 = Substrate content of cerebral blood is expected to be moderately reduced (i.e.  
168 complete mixing of placental and fetal systemic venous blood) (n = 46 (21 male),  $\mu =$   
169  $32.72 \text{ GW} \pm 1.74$ ),

170 (D) Group 4 = Substrate content of cerebral blood is expected to be severely reduced (i.e.  
171 complete reversal of normal placental streaming) (n = 23 (12 male),  $\mu = 33.12 \text{ GW} \pm$   
172  $2.02$ )

173 In the absence of direct measurements of cerebral substrate delivery, cases were classified by  
174 an expert fetal cardiologist, according to the expected effect of the underlying cardiac defect on  
175 the delivery of oxygen and nutritional content of blood to the carotid arteries, and by extension,  
176 the brain. MRI-derived fetal blood flows were used where available, as described in (Lloyd et.,  
177 2021). For cases where information about the direction of blood flow at the aortic isthmus could  
178 not be derived from MRI derived fetal blood flows, and was important for CHD categorization, it  
179 was extracted from the clinical fetal echocardiogram report, acquired as per routine clinical  
180 care. In cases where a diagnosis could potentially fit into more than one category, depending on  
181 severity or underlying hemodynamics, a combination of phase contrast (with metric optimized  
182 gating), fetal flow measurements (described in Lloyd et al., 2021, Janz et al., 2010) and/or  
183 contemporaneously acquired echocardiographic data were used to assign cases individually,  
184 following assessment of the data by a fetal cardiologist (Cromb et al., 2023).

### 185 **Image registration and Jacobian determinant calculation**

186 Non-linear deformation fields were calculated to transform the native subject T2 to the age-  
187 matched template of the dHCP fetal atlas (<https://doi.gin.g-node.org/10.12751/g-node.ysgsy1/>)  
188 using ANTs Symmetric diffeomorphic image registration (Avants et al., 2008). Warps were then  
189 concatenated between native T2, the age-matched template and a 30 GW template space,  
190 which represents the median age of the cohort (Avants et al., 2008). The log Jacobian  
191 determinant was calculated on the concatenated warp, which represents the contraction and  
192 expansion of brain regions during image registration. In the resultant log Jacobian maps, higher  
193 log-Jacobian values represent brain regions that contracted during image registration (i.e.,  
194 larger global and local brain volume), while smaller values represent smaller volume (Avants  
195 and Gee, 2004). The log Jacobian volumes for all subjects were concatenated to create a single  
196 4D file, which was used as the input for the ICA (Van Rossum and Drake, 1995, Varoquaux et  
197 al., 2010).



## 198 **Independent Component Analysis (ICA) of Jacobian determinants**

199 ICA is a data-driven, blind source separation technique that extracts salient patterns embedded  
200 in the data, it reduces the dimensionality of neuroimaging data (from many thousands of  
201 individual voxels) by separating out the multivariate signal into a maximally independent set of  
202 components (Jutten & Héroult, 1991). When applied in the spatial domain to structural imaging  
203 data (the log Jacobian determinants), ICA can detect coordinated growth between spatially  
204 separated brain regions, i.e. SCNs, which are strongly associated with other clinical or  
205 demographic variables (O’Muircheartaigh et al., 2014, Douad et al., 2014, Llera et al., 2019).

206 A canonical ICA algorithm (Varoquaux et al., 2010) was used, implemented in python using the  
207 Nilearn package (Abraham et al., 2014). The ICA algorithm transforms the input data into  
208 components (or SCNs) that represent an ‘unmixing’ of the signal, such that the independent  
209 components have distributions that are non-Gaussian. The optimal number of SCNs ( $n = 40$ ) for  
210 this case was chosen by surveying previous literature, and to balance robustness and  
211 interpretability (Eyre et al., 2021, Vanes et al., 2021). When the ICA dimensionality was  
212 increased above 40, visual inspection of components showed a division of cortical regions and  
213 splitting bilateral components into left/right lateralised areas.

214 The criteria for excluding components were (a) majority of the signal occurring in edge voxels,  
215 indicating misregistration (b) sparse, randomly distributed signal with low total area. For this  
216 dataset, all components passed the exclusion threshold and were included in subsequent  
217 analyses.

218 To extract weights, or ‘modes’, for each network in each individual subject, FSL’s general linear  
219 model was applied to the component maps and the Jacobian input volumes (Winkler et al.,  
220 2014, Anderson and Robinson 2001).

221 **Application of the General Linear Model (GLM) to identify covariates of brain structure.**

222 For each set of SCN weights, we fit a GLM, with SCN weights as the dependent variable, to test  
223 the hypothesis that age, sex, and cerebral substrate delivery were significant predictors  
224 affecting the modes of variation across the cohort.

225 We fit either 1A) or 1B) depending on whether the relationship between the SCN weights and  
226 GA was linear or 2<sup>nd</sup> order polynomial (determined by the Akaike Information Criterion (AIC)).

227 1 A) Modes ~ GA + sex + Cerebral substrate delivery

228 B) Modes ~ GA + GA<sup>2</sup> + sex + Cerebral substrate delivery

229 We then used a subset of the cohort, to explore the effect of cardiovascular physiology more  
230 specifically for each CHD diagnosis. We selected diagnosis categories with > 10 subjects.  
231 These included Tetralogy of Fallot (ToF) (n = 13), Transposition of the Great Arteries (TGA) (n =  
232 22), Right Aortic Arch (RAA) (n = 88), Hypoplastic Left Heart Syndrome (HLHS) (n = 25),  
233 Double Aortic Arch (DAA) (n = 27), Coarctation (CoA(+)) (n = 58), we also included fetuses with  
234 suspected coarctation prenatally who were not shown to have this condition in the neonatal  
235 period ("false positive" or CoA (-)) (n = 47). We included the CoA(-) group in this analysis, as it  
236 has been shown previously that this group differs significantly from a healthy control population  
237 in terms of the distribution of the fetal circulation, for reasons that remain unclear (Lloyd et al.,  
238 2021). Since the purpose of this work was to investigate the effect of cerebral substrate delivery  
239 on brain maturation, this group was included in our analysis.

240 2 A) Modes ~ GA + sex + CHD Diagnosis

241 B) Modes ~ GA + GA<sup>2</sup> + sex + CHD Diagnosis

242 We used FDR correction for multiple comparisons (between 40 models, one for each SCN) to  
243 adjust the p values for all predictors before reviewing whether they were significant in each  
244 model.

## 245 **Results**

### 246 **Participants**

247 429 subjects met the inclusion criteria, 67 were healthy controls (30 male) and 362 were  
248 diagnosed with CHD (182 male). All fetuses were scanned between 27- and 35-weeks  
249 gestational age (GA) (Figure 1). Histograms showing the distribution of GA at scan for each  
250 group are shown in Figure 1.

251 A wide spectrum of CHD was represented in this cohort, including 40 different diagnoses  
252 (Figure 1, 2), which were categorised into 4 groups based on expected cerebral substrate  
253 delivery (Cromb et al., 2023), Normal = 232, Mildly reduced = 67, Moderately reduced = 46,  
254 Severely reduced = 23. The range of CHD diagnoses within each group is shown in Figure 2.

255

### 256 **Structural covariance networks in the developing fetal CHD brain**

257 As shown in Figure 3, we extracted 40 SCNs, each representing independent, coordinated  
258 structural development between brain regions (Figure 4). ICA was effective at extracting  
259 meaningful neuroanatomical structures, and labels were given to each SCN according to the  
260 corresponding anatomy (Figure 4). Almost all networks were either bilateral and symmetrical or  
261 had a complementary contralateral homolog component in the opposite hemisphere (Figure 4).  
262 All tissue types in the brain were represented, including deep grey matter, white matter, cortical  
263 grey matter, and CSF. Certain SCNs were isolated to a specific tissue, and others included  
264 multiple tissue types. Charting the SCN modes against gestational age shows general

265 maturational trends (Supplementary info), however there is considerable variability between  
266 subjects of the same age, suggesting that there are other significant sources of variation  
267 between individuals, such as the abnormal fetal hemodynamics, for a large proportion of this  
268 cohort.

### 269 **Structural covariance is associated with cerebral substrate delivery.**

270 We fitted a GLM to each set of component weightings (also referred to as 'modes') to test  
271 whether age, sex and cerebral substrate delivery were underlying sources of variation across  
272 the cohort. 35 SCNs were significantly associated with GA, 9 with sex and 14 with expected  
273 cerebral substrate delivery after FDR correction for multiple comparisons between 40 ICs ( $q <$   
274  $0.05$ ) (Table 1). When we examined each substrate delivery group compared to controls, we  
275 found significant variation between controls and CHD where cerebral substrate delivery was  
276 expected to be normal, in 3 SCNs, including the left and right frontal temporal cortex/CSF  
277 networks, and frontoparietal cortex. These networks were also significantly different between  
278 controls and groups 2 and 3 (mildly and moderately reduced). In addition, there were  
279 differences between controls and 'mildly' and 'moderately' reduced groups in the medial frontal  
280 gyrus. The 'moderately reduced' group were uniquely different from controls in the postcentral  
281 gyrus and optic chiasm, and different from the 'expected normal' group in these networks. The  
282 'moderately reduced' group were also different from the 'expected normal' group in the anterior  
283 cingulum, thalamus, and mesencephalon networks.

284 There were no SCNs that have significantly different modes of variation between controls and  
285 the 'severely reduced' cerebral substrate delivery category. This might be due to a relatively  
286 small sample of fetuses in this category ( $n = 23$ ), limiting our statistical power to detect  
287 differences in this group. However, we did find networks distinguishing the 'severely reduced'  
288 CHD group from the 'expected normal' and 'mildly reduced' groups. These networks included

289 the precentral gyrus, occipital cortex/CSF, cerebellum & brainstem, and  
290 thalamus/mesencephalon. No significant differences were found between the ‘moderately’ and  
291 ‘severely’ reduced groups for any of the networks.

292 6 of the CHD-sensitive networks included high proportions of CSF, encompassing both extra-  
293 axial and infratentorial regions, suggested altered cortical expansion of these areas. These  
294 components also explained the highest proportion of the total variance across the cohort.

295 We created violin plots to show the model-fitted difference between groups, when accounting for  
296 age and sex, for components where there was a significant effect of expected cerebral substrate  
297 delivery (Figure 5). This highlighted the networks for which there was a gradient, or dose-  
298 dependent effect of cerebral substrate delivery, such as both left and right frontotemporal  
299 cortex/CSF networks and the cerebellum.

### 300 **The effect of specific CHD diagnoses on structural brain maturation**

301 Given the differences in structural covariance across the brain between CHD cerebral substrate  
302 groups, we carried out a sensitivity analysis in a subset of the cohort, to explore whether  
303 specific CHD diagnoses were predictors of variation (Table 1). In this way, we could test the  
304 hypothesis that specific cardiac defects have unique and distinct effects on structural brain  
305 maturation. We used a subset of the cohort (n = 238), only including CHD diagnosis categories  
306 with > 10 subjects (see Methods). We fit a GLM with SCN weights as the dependent variable,  
307 and tested for a combined effect of age, age<sup>2</sup>, sex and CHD diagnosis. There were 9 different  
308 SCNs where at least one of the CHD diagnosis categories explained a significant amount of the  
309 variation between individuals. The summary of SCNs that were significant for each diagnosis  
310 category after FDR correction (q < 0.05) are shown in Figure 5.

311 We found the frontoparietal network was significantly different between controls and all CHD  
312 diagnoses except for TGA (Table 1). We also found certain SCNs, where only one CHD  
313 diagnosis group was significantly different from controls. CoA (+) explained a significant  
314 proportion of the variation in the network corresponding to the medial frontal gyrus. HLHS  
315 explained a significant proportion of the variance in the postcentral gyrus, inferior frontal &  
316 superior temporal gyrus, and occipital cortex/CSF. Fetuses with ToF were uniquely different  
317 from controls in the frontotemporal cortex, medial occipital white matter, and occipital cortex.  
318 Both ToF and TGA were significant predictors of variance in the insula network.

319

## 320 **Discussion**

321 In this study we applied an unsupervised, data-driven analysis technique, ICA, to capture the  
322 dynamic T2w contrast changes across the fetal brain in space and time, summarising them into  
323 an interpretable set of anatomically meaningful networks, or SCNs (Comon 1994). The networks  
324 we derived correspond to recognisable structures in the fetal brain, including regions that are  
325 developmentally critical but transiently present in the fetal period, such as anterior and posterior  
326 periventricular crossroads. We used the networks to stratify the large heterogenous cohort of  
327 different CHD cases, identifying variation across the brain according to cerebral substrate  
328 delivery and specific CHD diagnosis. Of the 40 SCNs we derived, we found a significant effect  
329 of cerebral substrate delivery or CHD diagnosis in 18 of them.

330 **The maturation of specific networks is vulnerable to the effects of reduced cerebral**  
331 **substrate delivery.**

332 Previous work has demonstrated that hemodynamic alterations in fetuses with CHD contribute  
333 to abnormalities in brain development (Limperopoulos et al., 2010, Sun et al., 2015). Volumetric

334 differences correlate with cerebral substrate delivery in the third trimester (Peyvandi et al., 2021,  
335 Cromb et al., 2023), which represents a critical window of accelerated fetal brain growth and  
336 increased cerebral metabolic demands. A reasonable hypothesis to explain these findings is  
337 that reduced cerebral substrate delivery, secondary to altered fetal cardiovascular physiology, is  
338 a driving factor in the emergence of structural brain differences in CHD (Rudolph, 2010). In this  
339 study, we identified networks of brain regions vulnerable to the effects of altered cerebral  
340 substrate delivery which can be broadly grouped as follows, (1) Gyral areas, pre- and post-  
341 central, medial frontal (2) Thalamus & brainstem (3) Cerebellum & infratentorial CSF, (4)  
342 Cortical/CSF regions, frontoparietal, frontotemporal and occipital cortex/CSF. The sensitivity of  
343 these particular regions is congruent with results of other studies, also noting the most  
344 significant volumetric changes in CHD in the frontal lobe and the brainstem (Ortinou et al.,  
345 2019), impaired expansion of higher cortical areas (Leonetti et al., 2019), altered patterning and  
346 delayed maturation of cortical folds (Ortinou et al., 2019, Dovjak et al., 2022, Clouchoux et al.,  
347 2013, Kelly et al., 2017), abnormal cerebellar development (Dovjak et al., 2020) and enlarged  
348 CSF spaces (Limperopoulos et al., 2010, Jorgensen et al., 2018, Schellen et al., 2015, Mlczoch  
349 E et al., 2013, Brossard-Racine et al., 2014, Ng et al, 2020). Studies across multiple different  
350 cohorts, spanning a large gestational age range, between 20 weeks GA and term, have  
351 reported increased extra-axial CSF spaces in the fetal brain with CHD (Limperopoulos et al.,  
352 2010, Jorgensen et al., 2018, Schellen et al., 2015, Mlczoch E et al., 2013, Brossard-Racine et  
353 al., 2014), which has been interpreted as a general marker of delayed brain development in this  
354 population (Brossard-Racine et al., 2014).

### 355 **Cerebral substrate delivery explains some but not all of the variance in CHD**

356 We observed differences between healthy controls and CHD fetuses where cerebral substrate  
357 delivery is expected to be normal, in frontoparietal, frontotemporal and occipital cortical/CSF  
358 networks, suggesting extrinsic factors to this analysis, such as genetic and environmental

359 factors, also mediate the differences in early brain growth. Furthermore, when we explored  
360 specific CHD diagnoses in a subset of the cohort, we recapitulated this result, finding CoA (-),  
361 RAA, and DAA subtypes predicted the variance in the same frontoparietal cortex/CSF networks.  
362 These diagnoses are considered milder forms of CHD where cerebral substrate delivery is  
363 expected to be normal (Rudolph 2010). An alternative explanation for the difference in brain  
364 development is genetic variation among the milder phenotypes, which has not been accounted  
365 for in this analysis. Previous work has highlighted shared underlying genetic pathways between  
366 the heart and brain which may account for the phenotype of altered structural brain  
367 development in CHD (Unolt et al., 2018, Richards & Garg 2010). Genetic abnormalities are also  
368 highly prevalent in the CHD population (Blue et al., 2017), and protein-damaging *de novo*  
369 mutations have been identified for genes highly expressed in both the developing heart and  
370 brain (Homsy et al., 2015, Ji et al., 2020).

371 The residual variation in brain development between individuals in this work may also be  
372 mediated by differences in placental function. The parallel development between fetal and  
373 maternal organs, and the shared genetic and developmental pathways between the heart, brain,  
374 and placenta, are emerging as important contributing factors to the vulnerability of this patient  
375 group (Steinweg et al., 2021, Rychik et al., 2018, Jones et al., 2015, Matthiesen et al., 2016).  
376 Placental imaging studies have highlighted a critical relationship between placental size and  
377 overall fetal growth, in both healthy and at-risk populations, suggesting that over a third of birth  
378 weight variation is due to placental weight (Salafia et al., 2008). A growing body of evidence  
379 implicates abnormal placental structure and function in CHD pathology (Steinweg et al., 2021,  
380 Rychik et al., 2018, Jones et al., 2015, Matthiesen et al., 2016), and future work would benefit  
381 from investigating these effects on the structural brain.

382 **Specific diagnoses were better predictors of variance than others.**



383 When examining the differences between CHD diagnoses, HLHS and ToF were the most  
384 significant predictors of variance across different networks, in 4 and 5 SCNs respectively. We  
385 found a unique effect of HLHS diagnosis on three structural networks, including the postcentral  
386 gyrus, inferior frontal and superior temporal gyrus, and occipital cortical/CSF. In ToF fetuses,  
387 the medial occipital white matter, the insula, and the frontotemporal and occipital cortex were  
388 also significantly different from healthy controls. Previous studies have also observed a severe  
389 effect on brain development in fetuses and neonates diagnosed with either ToF (Schellen et al.,  
390 2015) or HLHS (Glauser et al., 1990, Clouchoux et al., 2013). One study reported significantly  
391 reduced cardiac output in HLHS fetuses and a dose-dependent effect on delayed brain  
392 maturation (Sun et al., 2015). Our analysis also highlighted the insula network as significantly  
393 different for fetuses with ToF or TGA compared to controls, in accordance with previous work  
394 noting delayed opercular development in term infants with complex CHD (Glauser et al., 1990,  
395 Masoller et al., 2016, Ortinau et al., 2019, Peng et al., 2016). Operculation of the insula is  
396 usually complete at term (Goldstein et al., 2017), however an open operculum and exposed  
397 insular cortex have been associated with neurodevelopmental delays in CHD and more broadly  
398 in other patient populations (Mahle et al., 2000, Licht et al., 2009, Tatum et al., 1989, Chen et  
399 al., 1996). Interestingly, TGA was not significantly different from controls for any of the networks  
400 except the insula. Although previous work has shown that whole brain volume is reduced in  
401 fetuses with TGA, and disproportionately smaller than the volume of the fetal body (Jorgensen  
402 et al., 2018, Cromb et al., 2023), our results suggest that the local effects across the brain are  
403 minimal. It is plausible that although the global brain size is smaller for this subtype, coordinated  
404 growth at the local level between brain structures is normal.

#### 405 **CHD-sensitive networks in frontal cortical regions**

406 Specific networks emerged as being affected by both cerebral substrate delivery and CHD  
407 diagnosis categories. These included frontoparietal, frontotemporal and occipital cortex. In the

408 fetal period, these networks likely represent altered volumes of CSF, in conjunction with the  
409 areal expansion and gyrification of the cortices. Previous work using a porcine model, explored  
410 the developmental processes effected by both transient and chronic disturbances in fetal  
411 oxygen delivery (Xuegang et al., 2011, Ishibashi et al., 2012, Morton et al., 2017), resolving that  
412 this may provide a mechanistic explanation for the effect of CHD on the development of higher  
413 order cortical areas. They established that inducing chronic hypoxic exposure decreases  
414 neuronal proliferation, migration, interneuron populations and overall volume in the insula and  
415 prefrontal cortices (Morton et al., 2017). In the same study, a parallel analysis of post-mortem  
416 brain tissue from infants with complex CHD revealed less mature astrocytic processes, and a  
417 depletion of neuroblasts within the subventricular zone in frontal areas (Morton et al., 2017). The  
418 authors speculate that this cellular phenotype may propagate to the level of neuronal circuits,  
419 creating an excitatory/inhibitory imbalance in the developing cortex in CHD (Morton et al., 2017).  
420 Excitatory/inhibitory imbalance has been investigated across a wide spectrum of intellectual and  
421 behavioural disabilities, potentially explaining why children with CHD show deficits in cognitive  
422 domains associated with higher order cortices (Leonetti et al., 2019).

### 423 **White matter dominated networks were largely not affected by CHD diagnosis**

424 Many white matter networks were extracted by this analysis, reflecting the growth of key white  
425 matter structures and development of fibre connectivity over the third trimester (Kostovic &  
426 Milosevic 2006, Wilson et al., 2021), including both the anterior and posterior periventricular  
427 crossroads, and the corpus callosum/cingulum components. However, in most of these  
428 networks we did not detect significant differences between CHD and the control population.  
429 Previous studies characterising white matter development in utero in fetuses with CHD  
430 (Clouchoux et al., 2013, Ortinau et al., 2018), show smaller white matter volumes, which may  
431 just reflect the overall reduction in brain size in this group. Diffusion weighted imaging (DWI)  
432 may be more appropriate to elucidate any aberrant white matter development in CHD, as

433 changes can be examined at the microstructural level. To the best of our knowledge, there is  
434 one previous study using in utero DWI in CHD, which suggests a group level reduction in  
435 fractional anisotropy in the body and splenium of the corpus callosum (Khan et al., 2018).  
436 However, a larger cohort of patients over a wider gestational age range is necessary to improve  
437 understanding of group level differences, as diffusion metrics show a non-linear relationship with  
438 gestational age in fetal white matter (Wilson et al., 2021).

## 439 **Conclusions**

440 Overall, this analysis framework offers an alternative approach to studying a heterogenous  
441 patient group, capturing variation associated with age, cerebral substrate delivery and CHD  
442 diagnosis. This work contributes to building a more comprehensive understanding of brain  
443 development in CHD before birth, in utero, highlighting regions that maturing differently in this  
444 vulnerable population. The significant effect of cerebral substrate delivery and CHD diagnosis  
445 on deep grey matter, cortical regions, cerebellum and CSF supports the view that a lower  
446 oxygen environment can lead to adverse neurodevelopment. However, we also demonstrate  
447 that there is a lot of variation between individuals not attributable to fetal hemodynamic  
448 alterations, supporting the hypothesis that in utero neurodevelopment in CHD is impacted by a  
449 complex combination of factors, including genetics, maternal stress, and placental function. Our  
450 unconstrained data-driven approach identified the same vulnerable brain regions as previous  
451 work (Ortinou et al., 2019, Dovak et al., 2022, Clouchoux et al., 2013, Limperopoulos et al.,  
452 2010, Jorgensen et al., 2018, Schellen et al., 2015, Claessens et al., 2019, Mlczech E et al.,  
453 2013, Brossard-Racine et al., 2014, Glauser et al., 1990, Masoller et al., 2016, Peng et al.,  
454 2016), which was reliant on a-priori segmentations. The reproducibility of this result supports  
455 that these findings are a meaningful reflection of biological differences between the patient and  
456 control group. The results highlight the potential for neuroimaging data in the fetal period to  
457 provide biomarkers for CHD subtypes, disentangling the unique effects of different CHD

458 diagnoses on structural neurodevelopment. Earlier identification of the structural brain networks  
459 that confer neurodevelopmental risk increases the likelihood of successful targeted intervention  
460 to improve outcomes later in life.

461

## 462 **Limitations**

463 There are some important limitations to note with this study. Firstly, the distribution of  
464 gestational ages between controls and fetuses with CHD was different. Although our model  
465 included GA, this may still result in some false positive or false negative significant networks.  
466 We were unable to discern the delivery of specific substrates, or measure substrate delivery  
467 quantitatively for every fetus. The cerebral substrate delivery groups also had uneven sample  
468 sizes, with a much higher proportion of subjects in the ‘expected normal’ group than any other  
469 group. This gave us more statistical power to detect differences between group 1 and controls  
470 compared to other groups, which may have led to some false negatives, as we would expect to  
471 find more differences between controls and more severe forms of CHD (Group 4 cases).  
472 Similarly for CHD diagnoses, more severe subtypes (TGA, ToF and HLHS) were less common,  
473 therefore our statistical tests were under powered, hampering our ability to detect differences.  
474 All imaging data was acquired on the same scanner, in the same hospital catchment area in  
475 central London, and despite the socioeconomic and racial diversity of London, our result may  
476 not be generalizable to other populations.

477

## 478 **Acknowledgments**

479 We would like to thank all the families who participated in this research. We would also like to  
480 thank the research radiologists, radiographers, and staff from the Evelina London Children’s  
481 Hospital Fetal and Paediatric Cardiology Departments and the Centre for the Developing Brain

482 at King's College London. Ethical approval for this study was provided by The National  
483 Research Ethics Service West London (07/H0707/105, 14/LO/1806, 17/LO/0292).

#### 484 **Sources of Funding**

485 This research was funded by the Medical Research Council UK (MR/L011530/1 and  
486 MR/V002465/1) and a Wellcome Trust IEH Award (102431). This research was supported by  
487 core funding from the Wellcome/EPSRC Centre for Medical Engineering (WT203148/Z/16/Z),  
488 and by the National Institute for Health Research (NIHR) Biomedical Research Centre based at  
489 Guy's and St Thomas' NHS Foundation Trust and King's College London. The views expressed  
490 are those of the authors and not necessarily those of the NHS, the NIHR or the Department of  
491 Health.

#### 492 **Disclosures**

493 The authors declare no conflict of interest.

#### 494 **References**

- 495 A. Richards, A. and Garg, V. (2010) 'Genetics of Congenital Heart Disease', *Current Cardiology*  
496 *Reviews*, 6(2), pp. 91–97. Available at: <https://doi.org/10.2174/157340310791162703>.
- 497 Abraham, A. *et al.* (2014) 'Machine learning for neuroimaging with scikit-learn', *Frontiers in*  
498 *Neuroinformatics*, 8. Available at: <https://doi.org/10.3389/fninf.2014.00014>.
- 499 Abu-Rustum, R. *et al.* (2016) 'Are There Head Volume Alterations at 11 to 14 Weeks in Fetuses  
500 with Congenital Heart Defects? A First Trimester Case Series', *American Journal of*  
501 *Perinatology Reports*, 06(02), pp. e232–e238. Available at: [https://doi.org/10.1055/s-0036-](https://doi.org/10.1055/s-0036-1584241)  
502 [1584241](https://doi.org/10.1055/s-0036-1584241).

- 503 Anderson, M.J. and Robinson, J. (2001) 'Permutation Tests for Linear Models', *Australian &*  
504 *New Zealand Journal of Statistics*, 43(1), pp. 75–88. Available at: [https://doi.org/10.1111/1467-](https://doi.org/10.1111/1467-842X.00156)  
505 [842X.00156](https://doi.org/10.1111/1467-842X.00156).
- 506 Andescavage, N.N. and Limperopoulos, C. (2021) 'Placental abnormalities in congenital heart  
507 disease', *Translational Pediatrics*, 10(8), pp. 2148–2156. Available at:  
508 <https://doi.org/10.21037/tp-20-347>.
- 509 Avants, B. *et al.* (2008) 'Symmetric diffeomorphic image registration with cross-correlation:  
510 Evaluating automated labeling of elderly and neurodegenerative brain', *Medical Image Analysis*,  
511 12(1), pp. 26–41. Available at: <https://doi.org/10.1016/j.media.2007.06.004>.
- 512 Avants, B. and Gee, J.C. (2004) 'Geodesic estimation for large deformation anatomical shape  
513 averaging and interpolation', *NeuroImage*, 23, pp. S139–S150. Available at:  
514 <https://doi.org/10.1016/j.neuroimage.2004.07.010>.
- 515 Bassett, D.S. *et al.* (2008) 'Hierarchical Organization of Human Cortical Networks in Health and  
516 Schizophrenia', *The Journal of Neuroscience*, 28(37), pp. 9239–9248. Available at:  
517 <https://doi.org/10.1523/JNEUROSCI.1929-08.2008>.
- 518 Bellinger, D.C. *et al.* (2011) 'Adolescents with d-transposition of the great arteries corrected with  
519 the arterial switch procedure: neuropsychological assessment and structural brain imaging',  
520 *Circulation*, 124(12), pp. 1361–1369. Available at:  
521 <https://doi.org/10.1161/CIRCULATIONAHA.111.026963>.
- 522 Block, A.J. *et al.* (2010) 'Clinically silent preoperative brain injuries do not worsen with surgery in  
523 neonates with congenital heart disease', *The Journal of Thoracic and Cardiovascular Surgery*,  
524 140(3), pp. 550–557. Available at: <https://doi.org/10.1016/j.jtcvs.2010.03.035>.

- 525 Blue, G.M. *et al.* (2017) 'Advances in the Genetics of Congenital Heart Disease', *Journal of the*  
526 *American College of Cardiology*, 69(7), pp. 859–870. Available at:  
527 <https://doi.org/10.1016/j.jacc.2016.11.060>.
- 528 Bonthron, A.F. *et al.* (2021) 'Individualized brain development and cognitive outcome in infants  
529 with congenital heart disease', *Brain Communications*, 3(2), p. fcab046. Available at:  
530 <https://doi.org/10.1093/braincomms/fcab046>.
- 531 Bouma, B.J. and Mulder, B.J.M. (2017) 'Changing Landscape of Congenital Heart Disease',  
532 *Circulation Research*, 120(6), pp. 908–922. Available at:  
533 <https://doi.org/10.1161/CIRCRESAHA.116.309302>.
- 534 Brossard-Racine, M. *et al.* (2014) 'Prevalence and Spectrum of In Utero Structural Brain  
535 Abnormalities in Fetuses with Complex Congenital Heart Disease', *American Journal of*  
536 *Neuroradiology*, 35(8), pp. 1593–1599. Available at: <https://doi.org/10.3174/ajnr.A3903>.
- 537 Butler, S.C. *et al.* (2022) 'Neurological features in infants with congenital heart disease',  
538 *Developmental Medicine & Child Neurology*, 64(6), pp. 762–770. Available at:  
539 <https://doi.org/10.1111/dmcn.15128>.
- 540 Chen, C.Y. *et al.* (1996) 'MR of the cerebral operculum: abnormal opercular formation in infants  
541 and children', *AJNR. American journal of neuroradiology*, 17(7), pp. 1303–1311.
- 542 Claessens, N.H.P. *et al.* (2018) 'Perioperative neonatal brain injury is associated with worse  
543 school- age neurodevelopment in children with critical congenital heart disease', *Developmental*  
544 *Medicine & Child Neurology*, 60(10), pp. 1052–1058. Available at:  
545 <https://doi.org/10.1111/dmcn.13747>.

- 546 Clouchoux, C. *et al.* (2012) 'Normative fetal brain growth by quantitative in vivo magnetic  
547 resonance imaging', *American Journal of Obstetrics and Gynecology*, 206(2), p. 173.e1-173.e8.  
548 Available at: <https://doi.org/10.1016/j.ajog.2011.10.002>.
- 549 Clouchoux, C. *et al.* (2013) 'Delayed Cortical Development in Fetuses with Complex Congenital  
550 Heart Disease', *Cerebral Cortex*, 23(12), pp. 2932–2943. Available at:  
551 <https://doi.org/10.1093/cercor/bhs281>.
- 552 Comon, P. (1994) 'Independent component analysis, A new concept?', *Signal Processing*,  
553 36(3), pp. 287–314. Available at: [https://doi.org/10.1016/0165-1684\(94\)90029-9](https://doi.org/10.1016/0165-1684(94)90029-9).
- 554 Cromb, D. *et al.* (2023) 'Total and Regional Brain Volumes in Fetuses With Congenital Heart  
555 Disease', *Journal of Magnetic Resonance Imaging*, p. jmri.29078. Available at:  
556 <https://doi.org/10.1002/jmri.29078>.
- 557 De Asis-Cruz, J. *et al.* (2015) 'Functional properties of resting state networks in healthy full-term  
558 newborns', *Scientific Reports*, 5(1), p. 17755. Available at: <https://doi.org/10.1038/srep17755>.
- 559 Dolk, H. *et al.* (2011) 'Congenital Heart Defects in Europe: Prevalence and Perinatal Mortality,  
560 2000 to 2005', *Circulation*, 123(8), pp. 841–849. Available at:  
561 <https://doi.org/10.1161/CIRCULATIONAHA.110.958405>.
- 562 Douaud, G. *et al.* (2014) 'A common brain network links development, aging, and vulnerability to  
563 disease', *Proceedings of the National Academy of Sciences*, 111(49), pp. 17648–17653.  
564 Available at: <https://doi.org/10.1073/pnas.1410378111>.
- 565 Dovjak, G.O. *et al.* (2022) 'Brainstem and cerebellar volumes at magnetic resonance imaging  
566 are smaller in fetuses with congenital heart disease', *American Journal of Obstetrics and*  
567 *Gynecology*, 227(2), p. 282.e1-282.e15. Available at: <https://doi.org/10.1016/j.ajog.2022.03.030>.



- 568 Eyre, M. *et al.* (2021) 'The Developing Human Connectome Project: typical and disrupted  
569 perinatal functional connectivity', *Brain*, 144(7), pp. 2199–2213. Available at:  
570 <https://doi.org/10.1093/brain/awab118>.
- 571 Fenchel, D. *et al.* (2020) 'Development of Microstructural and Morphological Cortical Profiles in  
572 the Neonatal Brain', *Cerebral Cortex*, 30(11), pp. 5767–5779. Available at:  
573 <https://doi.org/10.1093/cercor/bhaa150>.
- 574 Geng, X. *et al.* (2016) 'Structural and Maturation Covariance in Early Childhood Brain  
575 Development', *Cerebral Cortex*, p. bhw022. Available at: <https://doi.org/10.1093/cercor/bhw022>.
- 576 Gertsvolf, N. *et al.* (2018) 'Association between Subcortical Morphology and Cerebral White  
577 Matter Energy Metabolism in Neonates with Congenital Heart Disease', *Scientific Reports*, 8(1),  
578 p. 14057. Available at: <https://doi.org/10.1038/s41598-018-32288-3>.
- 579 Glauser, T.A. *et al.* (1990) 'Congenital Brain Anomalies Associated With the Hypoplastic Left  
580 Heart Syndrome', *Pediatrics*, 85(6), pp. 984–990. Available at:  
581 <https://doi.org/10.1542/peds.85.6.984>.
- 582 Goff, D.A. *et al.* (2014) 'Risk factors for preoperative periventricular leukomalacia in term  
583 neonates with hypoplastic left heart syndrome are patient related', *The Journal of Thoracic and  
584 Cardiovascular Surgery*, 147(4), pp. 1312–1318. Available at:  
585 <https://doi.org/10.1016/j.jtcvs.2013.06.021>.
- 586 Goldstein, I.S. *et al.* (2017) 'The Lateral Temporal Lobe in Early Human Life', *Journal of  
587 Neuropathology & Experimental Neurology*, 76(6), pp. 424–438. Available at:  
588 <https://doi.org/10.1093/jnen/nlx026>.

- 589 He, Y., Chen, Z. and Evans, A. (2008) 'Structural Insights into Aberrant Topological Patterns of  
590 Large-Scale Cortical Networks in Alzheimer's Disease', *The Journal of Neuroscience*, 28(18),  
591 pp. 4756–4766. Available at: <https://doi.org/10.1523/JNEUROSCI.0141-08.2008>.
- 592 Heinze, K. *et al.* (2015) 'Discrete Alterations of Brain Network Structural Covariance in  
593 Individuals at Ultra-High Risk for Psychosis', *Biological Psychiatry*, 77(11), pp. 989–996.  
594 Available at: <https://doi.org/10.1016/j.biopsych.2014.10.023>.
- 595 Homsy, J. *et al.* (2015) 'De novo mutations in congenital heart disease with neurodevelopmental  
596 and other congenital anomalies', *Science (New York, N.Y.)*, 350(6265), pp. 1262–1266.  
597 Available at: <https://doi.org/10.1126/science.aac9396>.
- 598 Hornberger, L.K. and Eckersley, L.G. (2021) 'Aortic Coarctation: The Fetal Cardiologist's  
599 Achilles Heel', *Circulation: Cardiovascular Imaging*, 14(7). Available at:  
600 <https://doi.org/10.1161/CIRCIMAGING.121.012877>.
- 601 Inversetti, A. *et al.* (2020) 'Prenatal Growth in Fetuses with Isolated Cyanotic and Non-Cyanotic  
602 Congenital Heart Defects', *Fetal Diagnosis and Therapy*, 47(5), pp. 411–419. Available at:  
603 <https://doi.org/10.1159/000493938>.
- 604 Ishibashi, N. *et al.* (2012) 'White matter protection in congenital heart surgery', *Circulation*,  
605 125(7), pp. 859–871. Available at: <https://doi.org/10.1161/CIRCULATIONAHA.111.048215>.
- 606 Jaimes, C. *et al.* (2020) 'In vivo characterization of emerging white matter microstructure in the  
607 fetal brain in the third trimester', *Human Brain Mapping*, 41(12), pp. 3177–3185. Available at:  
608 <https://doi.org/10.1002/hbm.25006>.
- 609 Jansz, M.S. *et al.* (2010) 'Metric optimized gating for fetal cardiac MRI', *Magnetic Resonance in*  
610 *Medicine*, 64(5), pp. 1304–1314. Available at: <https://doi.org/10.1002/mrm.22542>.

- 611 Ji, W. *et al.* (2020) 'De novo damaging variants associated with congenital heart diseases  
612 contribute to the connectome', *Scientific Reports*, 10(1), p. 7046. Available at:  
613 <https://doi.org/10.1038/s41598-020-63928-2>.
- 614 Jones, H.N. *et al.* (2015) 'Hypoplastic left heart syndrome is associated with structural and  
615 vascular placental abnormalities and leptin dysregulation', *Placenta*, 36(10), pp. 1078–1086.  
616 Available at: <https://doi.org/10.1016/j.placenta.2015.08.003>.
- 617 Jørgensen, D.E.S. *et al.* (2018) 'Longitudinal Brain and Body Growth in Fetuses With and  
618 Without Transposition of the Great Arteries: Quantitative Volumetric Magnetic Resonance  
619 Imaging Study', *Circulation*, 138(13), pp. 1368–1370. Available at:  
620 <https://doi.org/10.1161/CIRCULATIONAHA.118.034467>.
- 621 Jutten, C. and Herault, J. (1991) 'Blind separation of sources, part I: An adaptive algorithm  
622 based on neuromimetic architecture', *Signal Processing*, 24(1), pp. 1–10. Available at:  
623 [https://doi.org/10.1016/0165-1684\(91\)90079-X](https://doi.org/10.1016/0165-1684(91)90079-X).
- 624 Kelly, C.J. *et al.* (2017) 'Impaired development of the cerebral cortex in infants with congenital  
625 heart disease is correlated to reduced cerebral oxygen delivery', *Scientific Reports*, 7(1), p.  
626 15088. Available at: <https://doi.org/10.1038/s41598-017-14939-z>.
- 627 Kostović, I. and Jovanov-Milosević, N. (2006) 'The development of cerebral connections during  
628 the first 20-45 weeks' gestation', *Seminars in Fetal & Neonatal Medicine*, 11(6), pp. 415–422.  
629 Available at: <https://doi.org/10.1016/j.siny.2006.07.001>.
- 630 Kostovic, I. and Rakic, P. (1990) 'Developmental history of the transient subplate zone in the  
631 visual and somatosensory cortex of the macaque monkey and human brain', *The Journal of*  
632 *Comparative Neurology*, 297(3), pp. 441–470. Available at:  
633 <https://doi.org/10.1002/cne.902970309>.

- 634 Kuklisova-Murgasova, M. *et al.* (2012) 'Reconstruction of fetal brain MRI with intensity matching  
635 and complete outlier removal', *Medical Image Analysis*, 16(8), pp. 1550–1564. Available at:  
636 <https://doi.org/10.1016/j.media.2012.07.004>.
- 637 Latal, B. (2016) 'Neurodevelopmental Outcomes of the Child with Congenital Heart Disease',  
638 *Clinics in Perinatology*, 43(1), pp. 173–185. Available at:  
639 <https://doi.org/10.1016/j.clp.2015.11.012>.
- 640 Leonetti, C. *et al.* (2019) 'Cortical Dysmaturation in Congenital Heart Disease', *Trends in*  
641 *Neurosciences*, 42(3), pp. 192–204. Available at: <https://doi.org/10.1016/j.tins.2018.12.003>.
- 642 Li, X. *et al.* (2013) 'Age-related changes in brain structural covariance networks', *Frontiers in*  
643 *Human Neuroscience*, 7. Available at: <https://doi.org/10.3389/fnhum.2013.00098>.
- 644 Licht, D.J. *et al.* (2009) 'Brain maturation is delayed in infants with complex congenital heart  
645 defects', *The Journal of Thoracic and Cardiovascular Surgery*, 137(3), pp. 529–537. Available  
646 at: <https://doi.org/10.1016/j.jtcvs.2008.10.025>.
- 647 Limperopoulos, C. *et al.* (2010) 'Brain Volume and Metabolism in Fetuses With Congenital Heart  
648 Disease: Evaluation With Quantitative Magnetic Resonance Imaging and Spectroscopy',  
649 *Circulation*, 121(1), pp. 26–33. Available at:  
650 <https://doi.org/10.1161/CIRCULATIONAHA.109.865568>.
- 651 Llera, A. *et al.* (2019) 'Inter-individual differences in human brain structure and morphology link  
652 to variation in demographics and behavior', *eLife*, 8, p. e44443. Available at:  
653 <https://doi.org/10.7554/eLife.44443>.
- 654 Lloyd, D.F.A. *et al.* (2021) 'Analysis of 3-Dimensional Arch Anatomy, Vascular Flow, and  
655 Postnatal Outcome in Cases of Suspected Coarctation of the Aorta Using Fetal Cardiac

656 Magnetic Resonance Imaging', *Circulation: Cardiovascular Imaging*, 14(7). Available at:

657 <https://doi.org/10.1161/CIRCIMAGING.121.012411>.

658 Mahle, W.T. *et al.* (2002) 'An MRI study of neurological injury before and after congenital heart  
659 surgery', *Circulation*, 106(12 Suppl 1), pp. I109-114.

660 Marelli, A. *et al.* (2016) 'Brain in Congenital Heart Disease Across the Lifespan: The Cumulative  
661 Burden of Injury', *Circulation*, 133(20), pp. 1951–1962. Available at:

662 <https://doi.org/10.1161/CIRCULATIONAHA.115.019881>.

663 Masoller, N. *et al.* (2016) 'Mid- gestation brain Doppler and head biometry in fetuses with  
664 congenital heart disease predict abnormal brain development at birth', *Ultrasound in Obstetrics  
665 & Gynecology*, 47(1), pp. 65–73. Available at: <https://doi.org/10.1002/uog.14919>.

666 Matthiesen, N.B. *et al.* (2016) 'Congenital Heart Defects and Indices of Placental and Fetal  
667 Growth in a Nationwide Study of 924 422 Liveborn Infants', *Circulation*, 134(20), pp. 1546–  
668 1556. Available at: <https://doi.org/10.1161/CIRCULATIONAHA.116.021793>.

669 McQuillen, P.S. *et al.* (2007) 'Temporal and Anatomic Risk Profile of Brain Injury With Neonatal  
670 Repair of Congenital Heart Defects', *Stroke*, 38(2), pp. 736–741. Available at:

671 <https://doi.org/10.1161/01.STR.0000247941.41234.90>.

672 Mebius, M.J. *et al.* (2019) 'Growth patterns and cerebroplacental hemodynamics in fetuses with  
673 congenital heart disease', *Ultrasound in Obstetrics & Gynecology: The Official Journal of the  
674 International Society of Ultrasound in Obstetrics and Gynecology*, 53(6), pp. 769–778. Available  
675 at: <https://doi.org/10.1002/uog.19102>.

676 Mlczoch, E. *et al.* (2013) 'Structural congenital brain disease in congenital heart disease:  
677 Results from a fetal MRI program', *European Journal of Paediatric Neurology*, 17(2), pp. 153–

678 160. Available at: <https://doi.org/10.1016/j.ejpn.2012.07.004>.

- 679 Morton, P.D. *et al.* (2017) 'Abnormal neurogenesis and cortical growth in congenital heart  
680 disease', *Science Translational Medicine*, 9(374), p. eaah7029. Available at:  
681 <https://doi.org/10.1126/scitranslmed.aah7029>.
- 682 Naef, N. *et al.* (2017) 'Neurodevelopmental Profiles of Children with Congenital Heart Disease  
683 at School Age', *The Journal of Pediatrics*, 188, pp. 75–81. Available at:  
684 <https://doi.org/10.1016/j.jpeds.2017.05.073>.
- 685 Newburger, J.W. *et al.* (2012) 'Early developmental outcome in children with hypoplastic left  
686 heart syndrome and related anomalies: the single ventricle reconstruction trial', *Circulation*,  
687 125(17), pp. 2081–2091. Available at: <https://doi.org/10.1161/CIRCULATIONAHA.111.064113>.
- 688 Ng, I.H.X. *et al.* (2020) 'Investigating altered brain development in infants with congenital heart  
689 disease using tensor-based morphometry', *Scientific Reports*, 10(1), p. 14909. Available at:  
690 <https://doi.org/10.1038/s41598-020-72009-3>.
- 691 Ortinau, C.M. *et al.* (2018) 'Prenatal to postnatal trajectory of brain growth in complex congenital  
692 heart disease', *NeuroImage: Clinical*, 20, pp. 913–922. Available at:  
693 <https://doi.org/10.1016/j.nicl.2018.09.029>.
- 694 Ortinau, C.M. *et al.* (2019) 'Early-Emerging Sulcal Patterns Are Atypical in Fetuses with  
695 Congenital Heart Disease', *Cerebral Cortex*, 29(8), pp. 3605–3616. Available at:  
696 <https://doi.org/10.1093/cercor/bhy235>.
- 697 Paladini, D. *et al.* (2021) 'Frontal lobe growth is impaired in fetuses with congenital heart  
698 disease', *Ultrasound in Obstetrics & Gynecology*, 57(5), pp. 776–782. Available at:  
699 <https://doi.org/10.1002/uog.22127>.

- 700 Peng, Q. *et al.* (2016) 'Reduced fetal brain fissures depth in fetuses with congenital heart  
701 diseases: Reduced fissures in CHD', *Prenatal Diagnosis*, 36(11), pp. 1047–1053. Available at:  
702 <https://doi.org/10.1002/pd.4931>.
- 703 Peyvandi, S. *et al.* (2021) 'Fetal Cerebral Oxygenation Is Impaired in Congenital Heart Disease  
704 and Shows Variable Response to Maternal Hyperoxia', *Journal of the American Heart  
705 Association*, 10(1), p. e018777. Available at: <https://doi.org/10.1161/JAHA.120.018777>.
- 706 Peyvandi, S. and Rollins, C. (2023) 'Fetal Brain Development in Congenital Heart Disease',  
707 *Canadian Journal of Cardiology*, 39(2), pp. 115–122. Available at:  
708 <https://doi.org/10.1016/j.cjca.2022.09.020>.
- 709 Ren, J., Zhu, M. and Dong, S. (2021) 'Three-Dimensional Volumetric Magnetic Resonance  
710 Imaging Detects Early Alterations of the Brain Growth in Fetuses With Congenital Heart  
711 Disease', *Journal of Magnetic Resonance Imaging*, 54(1), pp. 263–272. Available at:  
712 <https://doi.org/10.1002/jmri.27526>.
- 713 Rollins, C.K. *et al.* (2021) 'Regional Brain Growth Trajectories in Fetuses with Congenital Heart  
714 Disease', *Annals of Neurology*, 89(1), pp. 143–157. Available at:  
715 <https://doi.org/10.1002/ana.25940>.
- 716 Rudolph, A.M. (2010) 'Congenital cardiovascular malformations and the fetal circulation',  
717 *Archives of Disease in Childhood - Fetal and Neonatal Edition*, 95(2), pp. F132–F136. Available  
718 at: <https://doi.org/10.1136/adc.2007.128777>.
- 719 Rychik, J. *et al.* (2018) 'Characterization of the Placenta in the Newborn with Congenital Heart  
720 Disease: Distinctions Based on Type of Cardiac Malformation', *Pediatric Cardiology*, 39(6), pp.  
721 1165–1171. Available at: <https://doi.org/10.1007/s00246-018-1876-x>.

- 722 Salafia, C.M. *et al.* (2008) 'Placental characteristics and birthweight', *Paediatric and Perinatal*  
723 *Epidemiology*, 22(3), pp. 229–239. Available at: [https://doi.org/10.1111/j.1365-](https://doi.org/10.1111/j.1365-3016.2008.00935.x)  
724 [3016.2008.00935.x](https://doi.org/10.1111/j.1365-3016.2008.00935.x).
- 725 Schellen, C. *et al.* (2015) 'Fetal MRI detects early alterations of brain development in Tetralogy  
726 of Fallot', *American Journal of Obstetrics and Gynecology*, 213(3), p. 392.e1-392.e7. Available  
727 at: <https://doi.org/10.1016/j.ajog.2015.05.046>.
- 728 Seeley, W.W. *et al.* (2009) 'Neurodegenerative Diseases Target Large-Scale Human Brain  
729 Networks', *Neuron*, 62(1), pp. 42–52. Available at: <https://doi.org/10.1016/j.neuron.2009.03.024>.
- 730 Spreng, R.N. and Turner, G.R. (2013) 'Structural Covariance of the Default Network in Healthy  
731 and Pathological Aging', *The Journal of Neuroscience*, 33(38), pp. 15226–15234. Available at:  
732 <https://doi.org/10.1523/JNEUROSCI.2261-13.2013>.
- 733 Steinweg, J.K. *et al.* (2021) 'T2\* placental MRI in pregnancies complicated with fetal congenital  
734 heart disease', *Placenta*, 108, pp. 23–31. Available at:  
735 <https://doi.org/10.1016/j.placenta.2021.02.015>.
- 736 Sun, L. *et al.* (2015) 'Reduced Fetal Cerebral Oxygen Consumption Is Associated With Smaller  
737 Brain Size in Fetuses With Congenital Heart Disease', *Circulation*, 131(15), pp. 1313–1323.  
738 Available at: <https://doi.org/10.1161/CIRCULATIONAHA.114.013051>.
- 739 Tatum, W.O. *et al.* (1989) 'The open opercular sign: Diagnosis and significance', *Annals of*  
740 *Neurology*, 25(2), pp. 196–199. Available at: <https://doi.org/10.1002/ana.410250216>.
- 741 Thompson, E. *et al.* (2020) 'Non-negative data-driven mapping of structural connections with  
742 application to the neonatal brain', *NeuroImage*, 222, p. 117273. Available at:  
743 <https://doi.org/10.1016/j.neuroimage.2020.117273>.



- 744 Unolt, M. *et al.* (2018) 'Congenital heart diseases and cardiovascular abnormalities in 22q11.2  
745 deletion syndrome: From well- established knowledge to new frontiers', *American Journal of*  
746 *Medical Genetics Part A*, 176(10), pp. 2087–2098. Available at:  
747 <https://doi.org/10.1002/ajmg.a.38662>.
- 748 Uus, A. *et al.* (2021) *3D UNet with GAN discriminator for robust localisation of the fetal brain*  
749 *and trunk in MRI with partial coverage of the fetal body*. preprint. Bioengineering. Available at:  
750 <https://doi.org/10.1101/2021.06.23.449574>.
- 751 Van Rossum, G. and Drake, F.L. (2011) *The Python Language Reference Manual*. Network  
752 Theory Limited (Python Manual). Available at:  
753 <https://books.google.co.uk/books?id=Ut4BuQAACAAJ>.
- 754 Vanes, L. *et al.* (2022) *Longitudinal neonatal brain development and socio-demographic*  
755 *correlates of infant outcomes following preterm birth*. preprint. Psychiatry and Clinical  
756 Psychology. Available at: <https://doi.org/10.1101/2022.08.11.22278469>.
- 757 Vanes, L.D. *et al.* (2021) 'Associations Between Neonatal Brain Structure, the Home  
758 Environment, and Childhood Outcomes Following Very Preterm Birth', *Biological Psychiatry*  
759 *Global Open Science*, 1(2), pp. 146–155. Available at:  
760 <https://doi.org/10.1016/j.bpsgos.2021.05.002>.
- 761 Varoquaux, G. *et al.* (2010) 'A group model for stable multi-subject ICA on fMRI datasets',  
762 *NeuroImage*, 51(1), pp. 288–299. Available at:  
763 <https://doi.org/10.1016/j.neuroimage.2010.02.010>.
- 764 Wilson, S. *et al.* (2021) 'Development of human white matter pathways in utero over the second  
765 and third trimester', *Proceedings of the National Academy of Sciences*, 118(20), p.  
766 e2023598118. Available at: <https://doi.org/10.1073/pnas.2023598118>.

767 Winkler, A.M. *et al.* (2014) 'Permutation inference for the general linear model', *NeuroImage*, 92,  
768 pp. 381–397. Available at: <https://doi.org/10.1016/j.neuroimage.2014.01.060>.

769 Wu, Y. *et al.* (2022) 'In Utero MRI Identifies Impaired Second Trimester Subplate Growth in  
770 Fetuses with Congenital Heart Disease', *Cerebral Cortex*, 32(13), pp. 2858–2867. Available at:  
771 <https://doi.org/10.1093/cercor/bhab386>.

772 Xuegang, L. *et al.* (2011) 'Porcine model of congenital heart defect with decreased pulmonary  
773 blood flow', *Cell Biochemistry and Biophysics*, 61(3), pp. 725–730. Available at:  
774 <https://doi.org/10.1007/s12013-011-9246-9>.

775 Zhang, T.-N. *et al.* (2021) 'Environmental Risk Factors and Congenital Heart Disease: An  
776 Umbrella Review of 165 Systematic Reviews and Meta-Analyses With More Than 120 Million  
777 Participants', *Frontiers in Cardiovascular Medicine*, 8, p. 640729. Available at:  
778 <https://doi.org/10.3389/fcvm.2021.640729>.

779

## 780 **Figures**

781

782

783

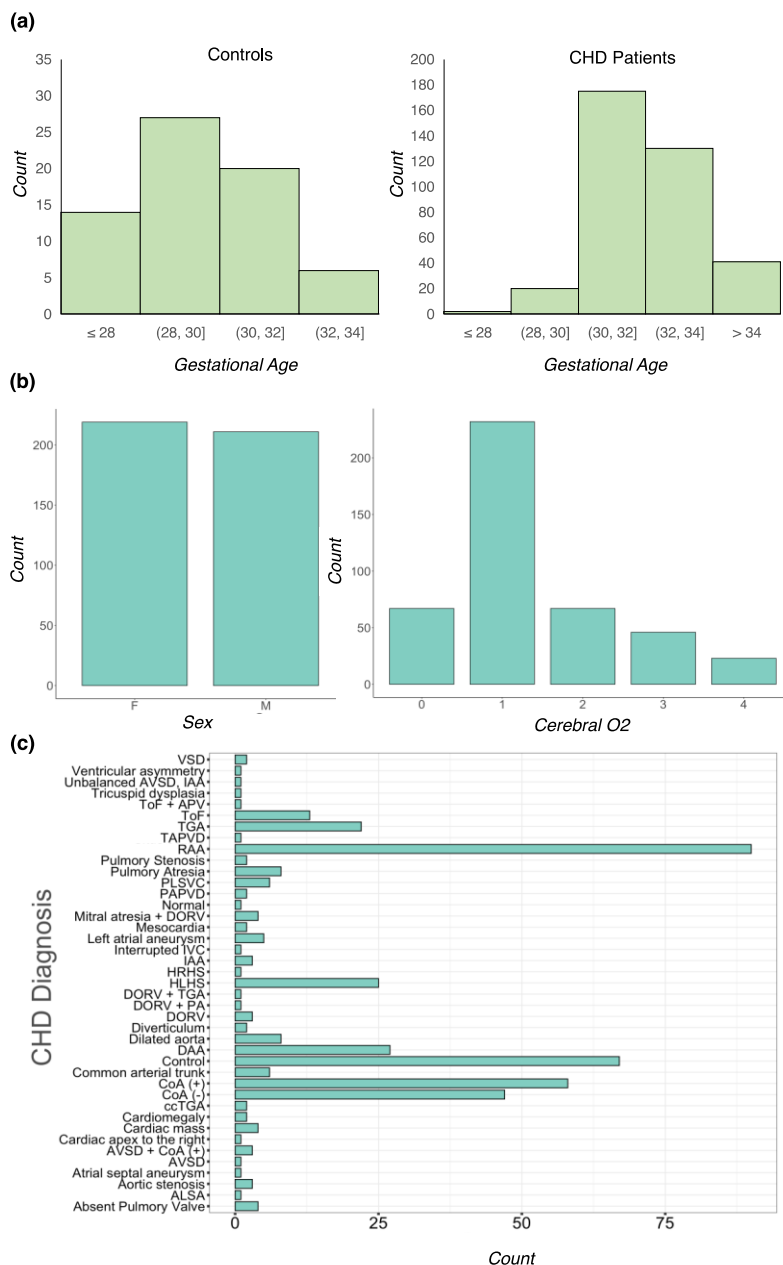

784

785 **Figure 1. Distribution of covariates and cohort information** (a) Gestational age (GA)  
 786 distribution for controls and CHD patient populations (b) Sex and Cerebral substrate delivery  
 787 grouping (0 = control, 1 = expected normal, 2 = mildly reduced, 3 = moderately reduced, 4 =  
 788 severely reduced). See Methods section 'CHD categorisation'. (c) Distribution of CHD  
 789 Diagnoses within the patient cohort.

790

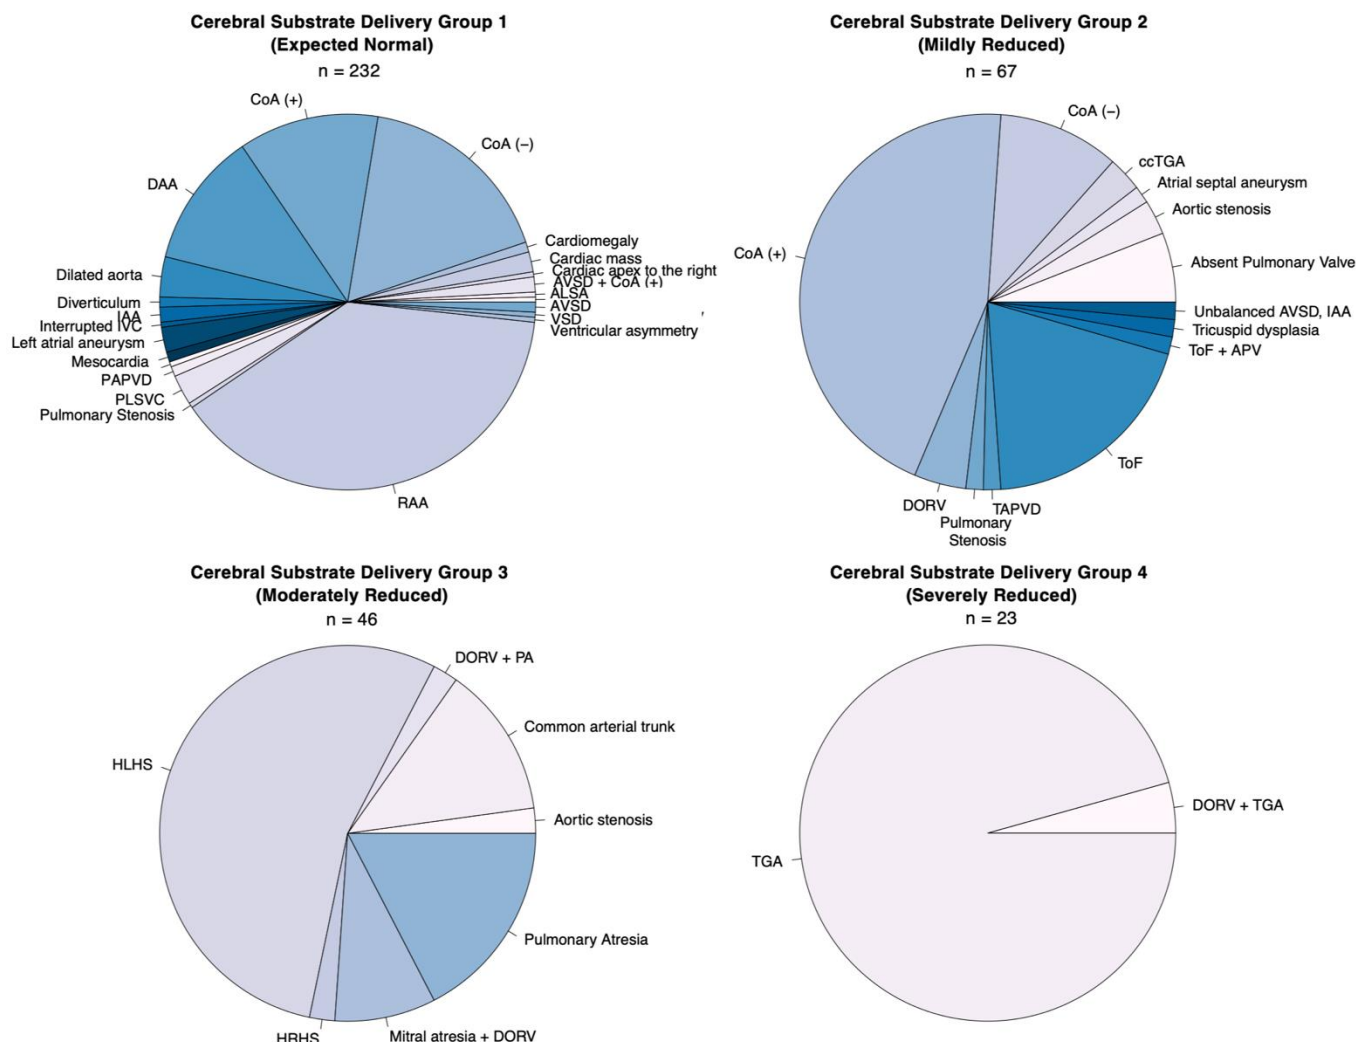

791 **Figure 2. CHD grouping according to cerebral substrate delivery ICA separates a**  
 792 **multivariate signal (the T2w log jacobians) into additive, independent subcomponents that**  
 793 **represent brain regions covarying between individuals.**

794

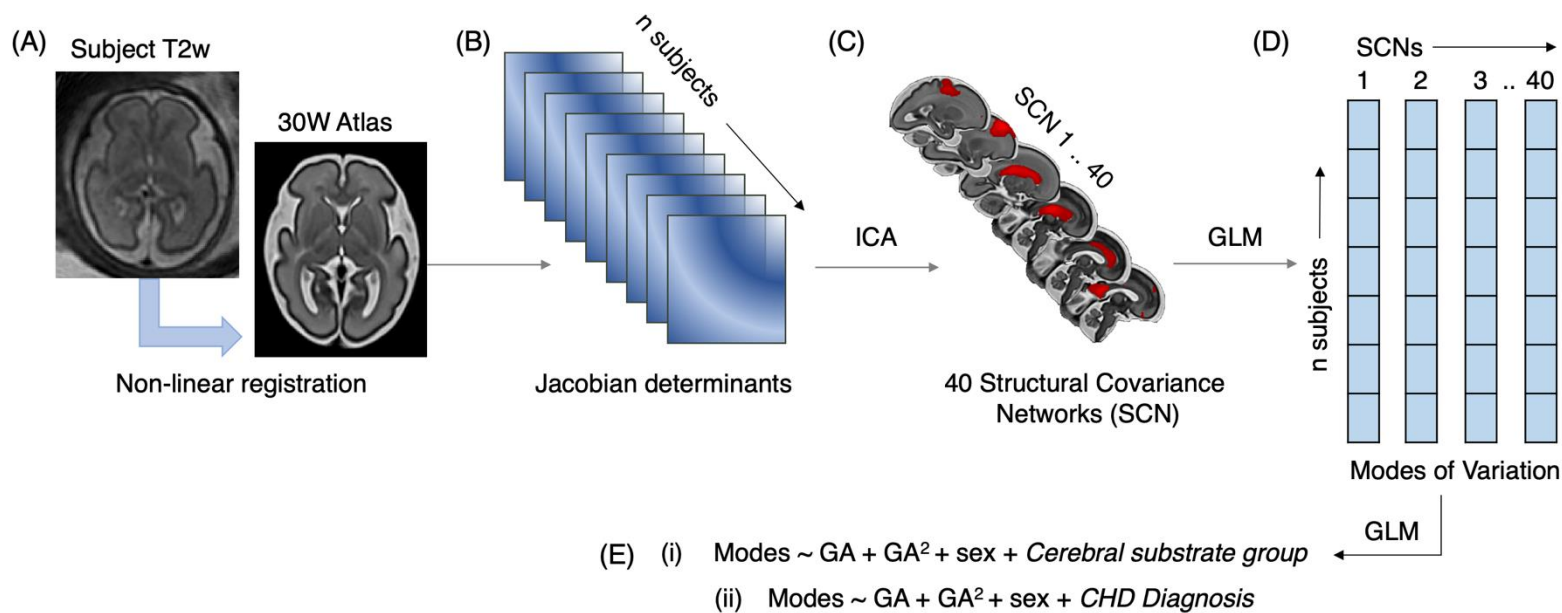

795 **Figure 3. Methods pipeline to extract Structural Covariance Networks**

796 (A) Reconstructed motion corrected T2w fetal MRI is registered to the 30 GW Atlas, using  
 797 non-linear registration (B) The log Jacobian of the warp is calculated (C) Jacobians are  
 798 concatenated across all subjects and used as input to the canonical ICA algorithm, to  
 799 extract 40 SCNs (D) A GLM is fit to the Jacobians & the SCNs, to extract an SCN  
 800 weighting (or ‘modes’) for each subject. (E) To examine the underlying sources of  
 801 variation between modes for each SCN, two GLMs were fit, testing the effect of GA,  
 802 GA<sup>2</sup>, sex and either (i) cerebral substrate grouping or (ii) CHD Diagnosis.

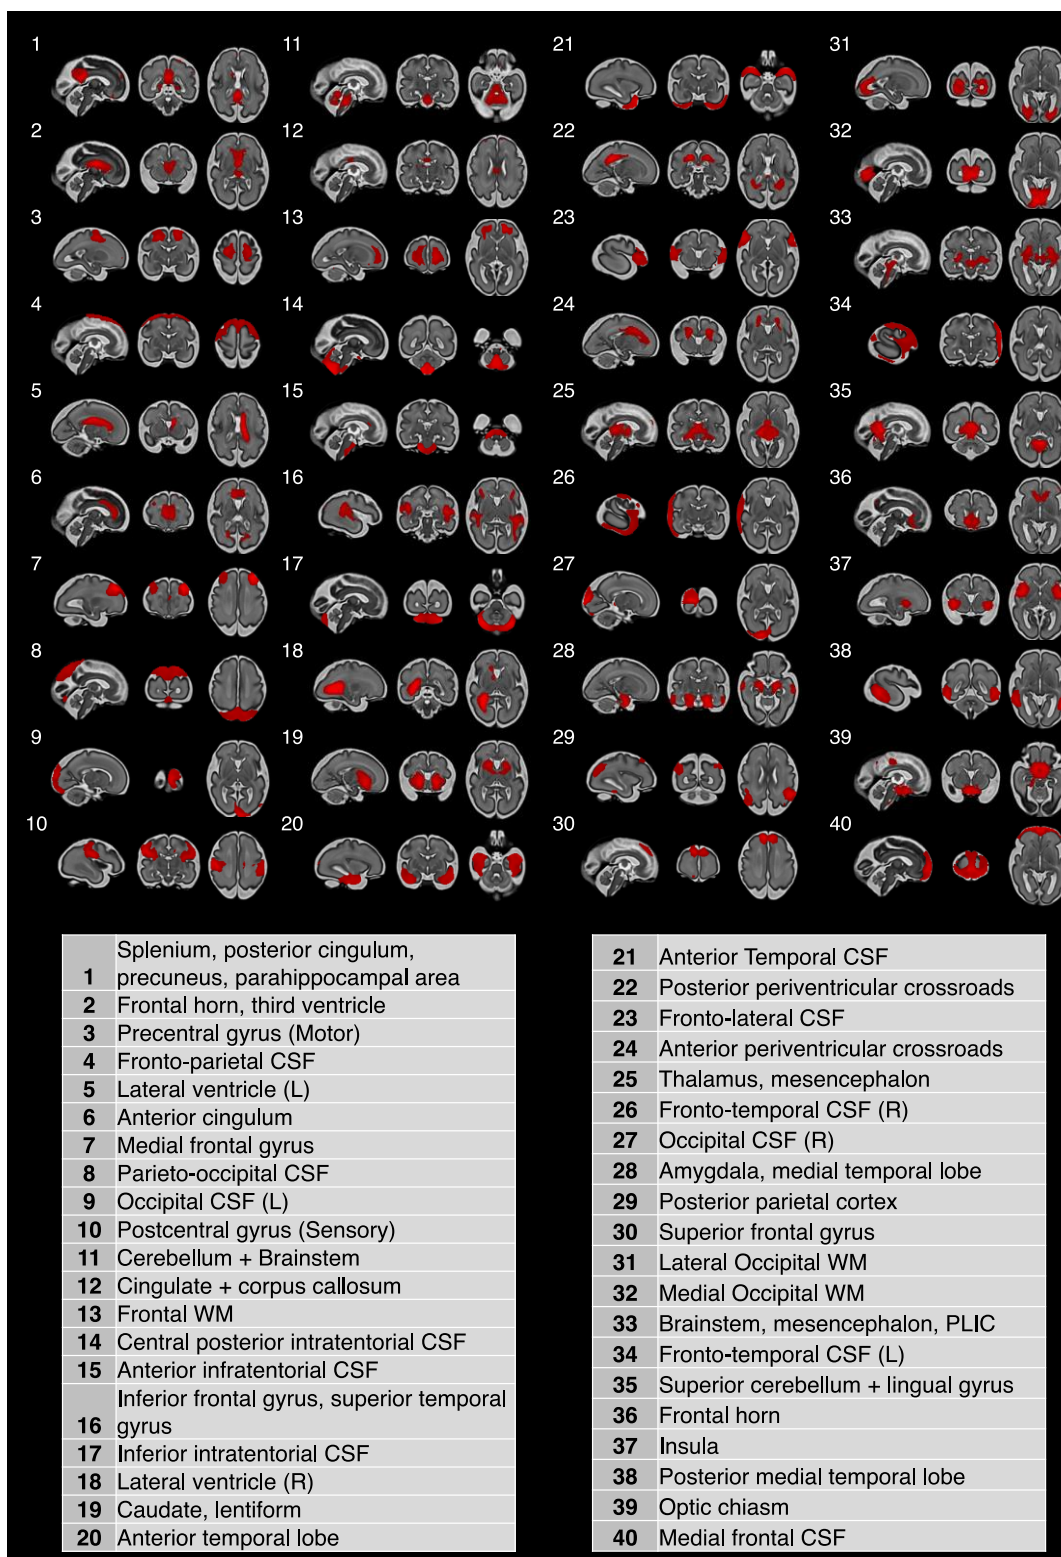

803 **Figure 4. Structural covariance networks identified by ICA.** 40 independent SCNs overlaid  
 804 on a 30 GW fetal atlas. Table contains labels summarising their neuroanatomy.

805

SCN Weights ~ GA + Sex + **Cerebral Substrate Delivery Group**  
(p)

SCN Weights ~ GA + Sex + **CHD Diagnosis**  
(p)

| SCN | Anatomy                                         | % Variance Explained | GA fit | GA Sig | Sex | Control |       |       |       | 1 vs. 2 |         |         |         | 1 vs. 3 |         |        |        | 1 vs. 4 |       |       |       | 2 vs. 3 |       |       |       | 2 vs. 4 |       |       |       | 3 vs. 4 |       |       |       | CoA(-) | CoA(+) | DAA | HLHS | RAA | TGA | ToF |
|-----|-------------------------------------------------|----------------------|--------|--------|-----|---------|-------|-------|-------|---------|---------|---------|---------|---------|---------|--------|--------|---------|-------|-------|-------|---------|-------|-------|-------|---------|-------|-------|-------|---------|-------|-------|-------|--------|--------|-----|------|-----|-----|-----|
|     |                                                 |                      |        |        |     | vs. 1   | vs. 2 | vs. 3 | vs. 4 | 1 vs. 2 | 1 vs. 3 | 1 vs. 4 | 2 vs. 3 | 2 vs. 4 | 3 vs. 4 | CoA(-) | CoA(+) | DAA     | HLHS  | RAA   | TGA   | ToF     |       |       |       |         |       |       |       |         |       |       |       |        |        |     |      |     |     |     |
| 3   | Precentral gyrus (Motor)                        | 1.74                 | 0      | 0      | 0   | 0.857   | 0.109 | 0.187 | 0.739 | 0.011   | 0.077   | 0.533   | 0.674   | 0.025   | 0.077   | 0.620  | 0.561  | 0.561   | 0.404 | 0.998 | 0.561 | 0.561   | 0.620 | 0.561 | 0.561 | 0.404   | 0.998 | 0.561 | 0.561 | 0.404   | 0.998 | 0.561 | 0.561 |        |        |     |      |     |     |     |
| 4   | Fronto-parietal CTX/CSF                         | 4.27                 | 1      | 1      | 0   | 0.001   | 0.002 | 0.001 | 0.067 | 0.764   | 0.370   | 0.764   | 0.719   | 0.764   | 0.322   | 0.006  | 0.014  | 0.001   | 0.001 | 0.008 | 0.093 | 0.001   | 0.006 | 0.014 | 0.001 | 0.001   | 0.008 | 0.093 | 0.001 | 0.006   | 0.014 | 0.001 | 0.001 | 0.008  | 0.093  |     |      |     |     |     |
| 5   | Lateral ventricle (L)                           | 3.68                 | 1      | 1      | 0   | 0.799   | 0.816 | 0.799 | 0.799 | 0.574   | 0.590   | 0.574   | 0.574   | 0.816   | 0.432   | 0.842  | 0.842  | 0.842   | 0.842 | 0.842 | 0.842 | 0.842   | 0.842 | 0.842 | 0.842 | 0.842   | 0.842 | 0.842 | 0.842 | 0.842   | 0.842 | 0.842 | 0.842 | 0.842  | 0.842  |     |      |     |     |     |
| 6   | Anterior cingulum                               | 1.61                 | 2      | 1      | 0   | 0.974   | 0.798 | 0.167 | 0.565 | 0.556   | 0.022   | 0.385   | 0.288   | 0.599   | 0.518   | 0.870  | 0.589  | 0.589   | 0.083 | 0.870 | 0.524 | 0.524   | 0.870 | 0.589 | 0.589 | 0.083   | 0.870 | 0.524 | 0.524 | 0.870   | 0.589 | 0.589 | 0.083 | 0.870  | 0.524  |     |      |     |     |     |
| 7   | Medial frontal gyrus                            | 1.25                 | 1      | 1      | 0   | 0.389   | 0.010 | 0.018 | 0.599 | 0.010   | 0.029   | 0.910   | 0.900   | 0.085   | 0.127   | 0.964  | 0.028  | 0.993   | 0.056 | 0.339 | 0.964 | 0.424   | 0.964 | 0.028 | 0.993 | 0.056   | 0.339 | 0.964 | 0.424 | 0.964   | 0.028 | 0.993 | 0.056 | 0.339  | 0.964  |     |      |     |     |     |
| 9   | Occipital CTX/CSF (L)                           | 1.60                 | 1      | 1      | 0   | 0.762   | 0.010 | 0.762 | 0.766 | 0.002   | 0.897   | 0.691   | 0.014   | 0.008   | 0.762   | 0.745  | 0.320  | 0.818   | 0.818 | 0.818 | 0.818 | 0.818   | 0.745 | 0.320 | 0.818 | 0.818   | 0.818 | 0.818 | 0.818 | 0.818   | 0.818 | 0.818 | 0.818 | 0.818  | 0.818  |     |      |     |     |     |
| 10  | Postcentral gyrus (Sensory)                     | 1.72                 | 1      | 1      | 0   | 0.244   | 0.122 | 0.019 | 0.244 | 0.326   | 0.036   | 0.513   | 0.262   | 0.879   | 0.265   | 0.519  | 0.377  | 0.492   | 0.037 | 0.519 | 0.377 | 0.816   | 0.519 | 0.377 | 0.492 | 0.037   | 0.519 | 0.377 | 0.816 | 0.519   | 0.377 | 0.492 | 0.037 | 0.519  | 0.377  |     |      |     |     |     |
| 11  | Cerebellum + Brainstem                          | 3.91                 | 1      | 1      | 1   | 0.253   | 0.253 | 0.814 | 0.263 | 0.465   | 0.155   | 0.036   | 0.082   | 0.020   | 0.336   | 0.258  | 0.518  | 0.412   | 0.258 | 0.258 | 0.258 | 0.962   | 0.258 | 0.518 | 0.412 | 0.258   | 0.258 | 0.258 | 0.258 | 0.258   | 0.258 | 0.258 | 0.962 | 0.258  |        |     |      |     |     |     |
| 14  | Cerebellum/ Intra-ventricular CTX/CSF           | 2.82                 | 2      | 1      | 1   | 0.518   | 0.411 | 0.712 | 0.518 | 0.002   | 0.216   | 0.170   | 0.250   | 0.697   | 0.712   | 0.796  | 0.832  | 0.832   | 0.832 | 0.832 | 0.796 | 0.407   | 0.796 | 0.832 | 0.832 | 0.832   | 0.832 | 0.832 | 0.796 | 0.407   | 0.796 | 0.832 | 0.832 | 0.832  | 0.832  |     |      |     |     |     |
| 16  | Inferior frontal gyrus, superior temporal gyrus | 1.35                 | 1      | 1      | 0   | 0.553   | 0.704 | 0.263 | 0.104 | 0.700   | 0.454   | 0.144   | 0.377   | 0.128   | 0.292   | 0.879  | 0.879  | 0.102   | 0.015 | 0.343 | 0.102 | 0.343   | 0.879 | 0.879 | 0.102 | 0.015   | 0.343 | 0.102 | 0.343 | 0.102   | 0.343 | 0.102 | 0.343 | 0.102  | 0.343  |     |      |     |     |     |
| 25  | Thalamus, mesencephalon                         | 1.71                 | 2      | 1      | 1   | 0.755   | 0.347 | 0.268 | 0.268 | 0.056   | 0.038   | 0.038   | 0.592   | 0.415   | 0.592   | 0.675  | 0.675  | 0.833   | 0.675 | 0.833 | 0.675 | 0.675   | 0.675 | 0.675 | 0.833 | 0.675   | 0.833 | 0.675 | 0.833 | 0.675   | 0.833 | 0.675 | 0.833 | 0.675  |        |     |      |     |     |     |
| 26  | Fronto-temporal CTX/CSF (R)                     | 5.12                 | 1      | 1      | 0   | 0.025   | 0.025 | 0.025 | 0.274 | 0.397   | 0.397   | 0.730   | 0.926   | 0.457   | 0.443   | 0.189  | 0.424  | 0.424   | 0.057 | 0.057 | 0.424 | 0.990   | 0.189 | 0.424 | 0.424 | 0.057   | 0.057 | 0.424 | 0.990 | 0.189   | 0.424 | 0.424 | 0.057 | 0.057  | 0.424  |     |      |     |     |     |
| 27  | Occipital CTX/CSF (R)                           | 1.62                 | 1      | 1      | 0   | 0.127   | 0.237 | 0.122 | 0.311 | 0.925   | 0.560   | 0.925   | 0.563   | 0.973   | 0.438   | 0.089  | 0.074  | 0.530   | 0.016 | 0.119 | 0.530 | 0.929   | 0.089 | 0.074 | 0.530 | 0.016   | 0.119 | 0.530 | 0.929 | 0.089   | 0.074 | 0.530 | 0.929 | 0.089  | 0.074  |     |      |     |     |     |
| 32  | Medial Occipital WM                             | 2.46                 | 2      | 1      | 0   | 0.095   | 0.095 | 0.013 | 0.439 | 0.650   | 0.142   | 0.650   | 0.280   | 0.650   | 0.104   | 0.191  | 0.118  | 0.761   | 0.052 | 0.426 | 0.571 | 0.021   | 0.191 | 0.118 | 0.761 | 0.052   | 0.426 | 0.571 | 0.021 | 0.191   | 0.118 | 0.761 | 0.052 | 0.426  |        |     |      |     |     |     |
| 34  | Fronto-temporal CTX/CSF (L)                     | 5.26                 | 1      | 1      | 0   | 0.024   | 0.024 | 0.024 | 0.933 | 0.406   | 0.406   | 0.235   | 0.793   | 0.111   | 0.088   | 0.370  | 0.370  | 0.370   | 0.143 | 0.095 | 0.833 | 0.044   | 0.370 | 0.370 | 0.370 | 0.143   | 0.095 | 0.833 | 0.044 | 0.370   | 0.370 | 0.370 | 0.143 | 0.095  | 0.833  |     |      |     |     |     |
| 37  | Insula                                          | 1.54                 | 2      | 1      | 0   | 0.352   | 0.352 | 0.352 | 0.117 | 0.632   | 0.632   | 0.238   | 0.931   | 0.423   | 0.562   | 0.221  | 0.733  | 0.362   | 0.072 | 0.420 | 0.048 | 0.048   | 0.221 | 0.733 | 0.362 | 0.072   | 0.420 | 0.048 | 0.048 | 0.221   | 0.733 | 0.362 | 0.072 | 0.420  |        |     |      |     |     |     |
| 39  | Optic chiasm                                    | 1.99                 | 1      | 1      | 0   | 0.826   | 0.826 | 0.048 | 0.826 | 0.360   | 0.001   | 0.699   | 0.119   | 0.777   | 0.058   | 0.521  | 0.968  | 0.521   | 0.417 | 0.968 | 0.968 | 0.968   | 0.521 | 0.968 | 0.521 | 0.417   | 0.968 | 0.968 | 0.968 | 0.968   | 0.968 | 0.968 | 0.968 | 0.968  |        |     |      |     |     |     |
| 40  | Medial frontal CTX/CSF                          | 2.71                 | 1      | 1      | 0   | 0.182   | 0.040 | 0.071 | 0.281 | 0.223   | 0.237   | 0.808   | 0.807   | 0.503   | 0.683   | 0.520  | 0.520  | 0.934   | 0.520 | 0.520 | 0.520 | 0.224   | 0.520 | 0.520 | 0.934 | 0.520   | 0.520 | 0.520 | 0.520 | 0.520   | 0.520 | 0.520 | 0.224 |        |        |     |      |     |     |     |

806

807 **Table 1. 18 SCNs where Cerebral Substrate Delivery and CHD Diagnosis are significant**  
 808 **predictors of variance.** Adjusted p values after FDR correction for multiple comparisons  
 809 between components ( $q < 0.05$ ). Significant comparisons are indicated with coloured box. Table  
 810 also contains column of the proportion of total variance across the cohort explained by each  
 811 SCN, whether there was a relationship with GA, (0 = No relationship, 1 = linear, or 2 = 2<sup>nd</sup> order  
 812 polynomial), and if GA/sex were significant predictors of variance in the GLM.

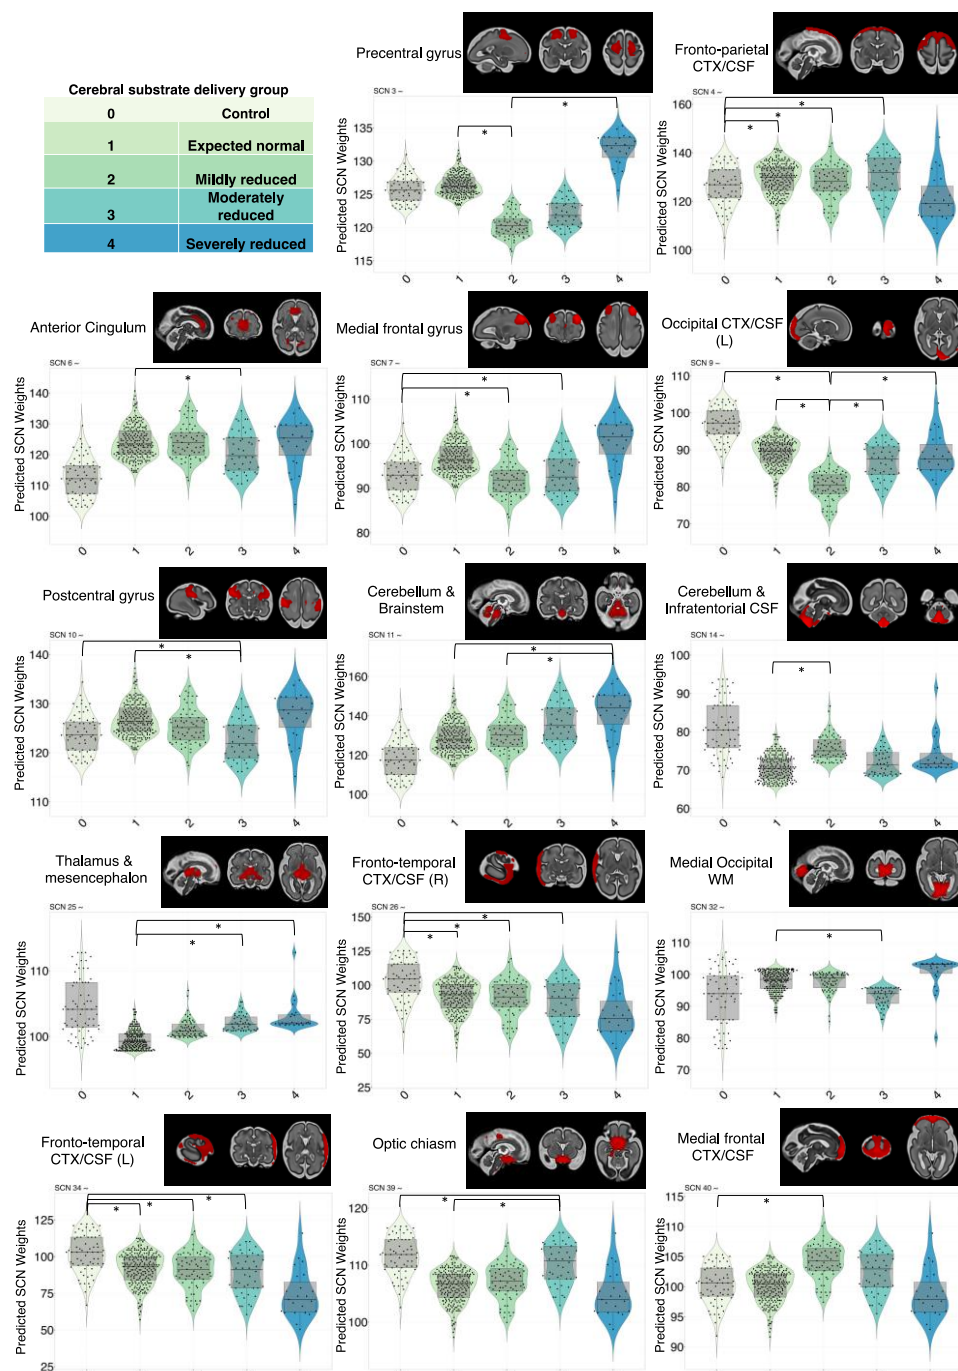

813 **Figure 5. Structural covariance explained by cerebral substrate delivery.** For each  
 814 significant component, the GLM predicted modes are shown (when accounting for gestational  
 815 age, sex and cerebral substrate delivery group), arranged along the x axis by cerebral substrate  
 816 delivery groups (key shown in top left hand corner). (\*) denotes significant difference between  
 817 groups after correcting for multiple comparisons (FDR,  $q < 0.05$ ).



818

819

820
